# Supplementary material for: LABs Fermentation Side-Product Positively Influences Rhizosphere and Plant Growth in Greenhouse Lettuce and Tomatoes
Source: MDPI journal article supplement (doi:10.3390/land11091544), 2022-09-12
Supplement: s1 [file s1]

# Supplementary Materials

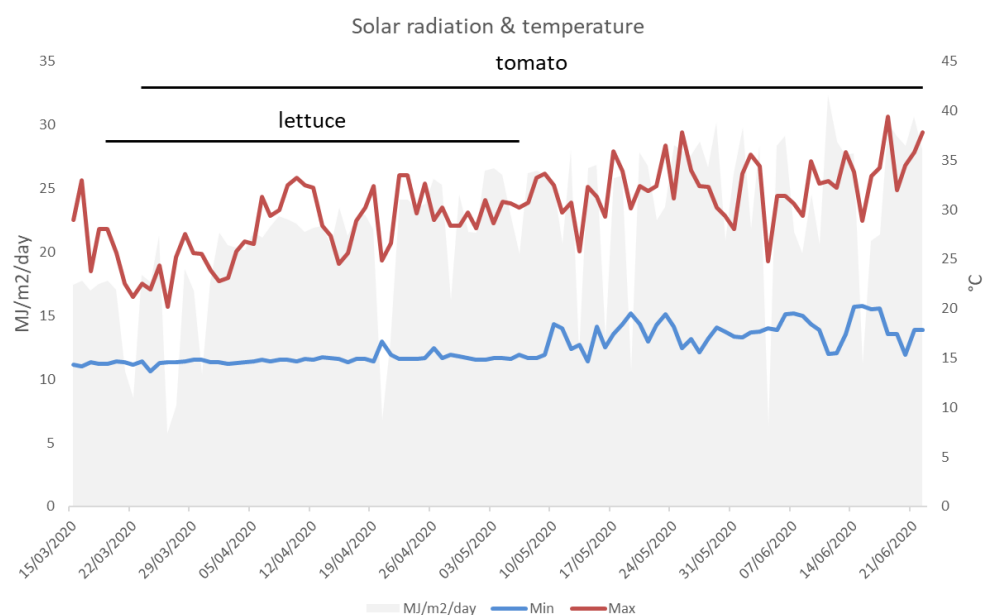

**Figure S1:** solar radiation and temperature in the greenhouse. The solar radiation monitored near the greenhouse (grey area, expressed in MJ/m<sup>2</sup>/day) and the maximum (red line) and minimum (blue line) air temperature (°C) in the greenhouse were recorded from mid-March to the third week of June 2020. The duration of lettuce and tomato trials is reported above the graph with black lines.

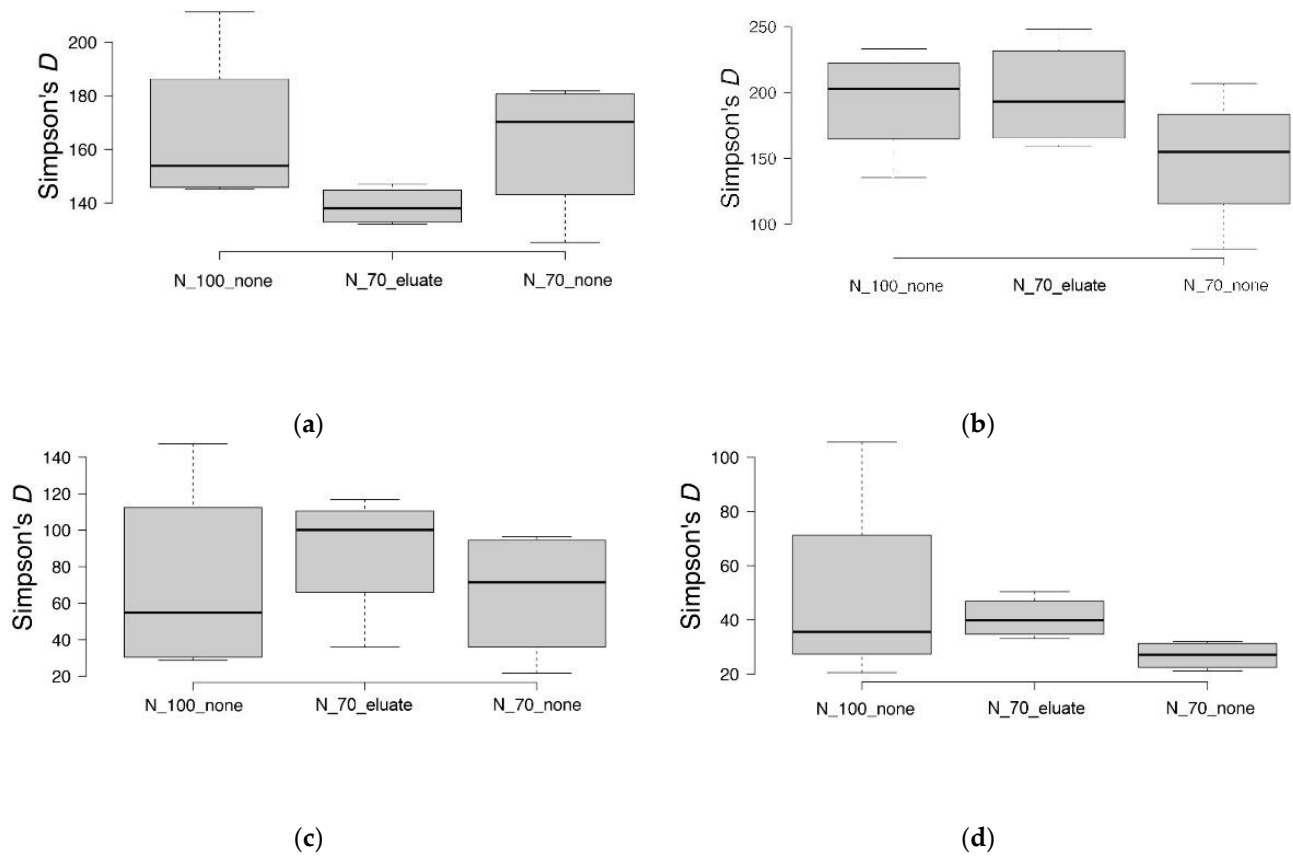

**Figure S2:** representation of  $\alpha$ -diversity and richness of bacterial OTUs in tomato (a) lettuce (b) and fungal OTUs in tomato (c) and lettuce (d).

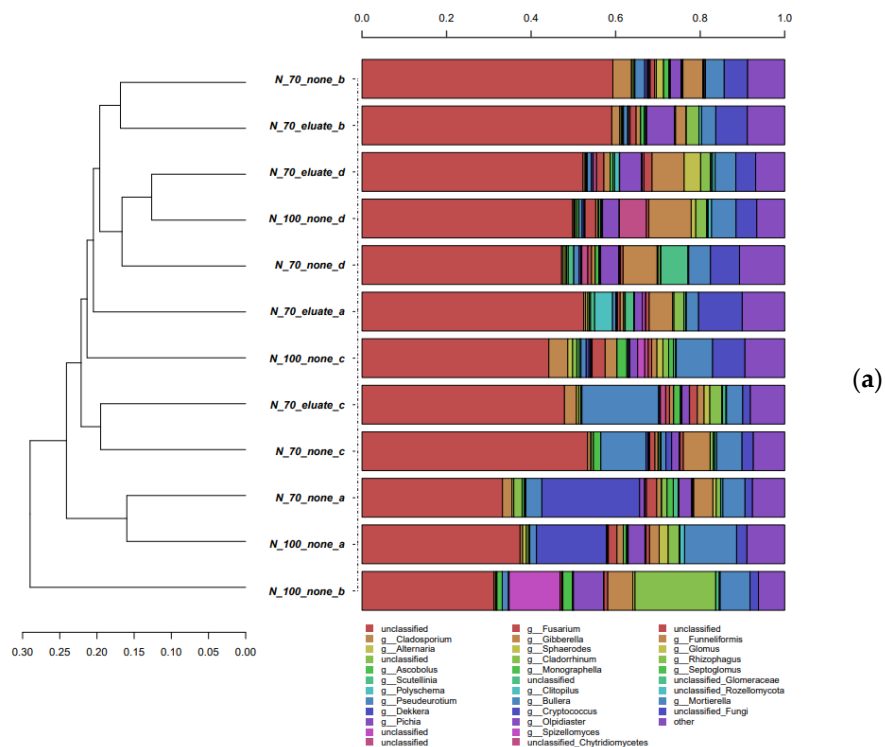

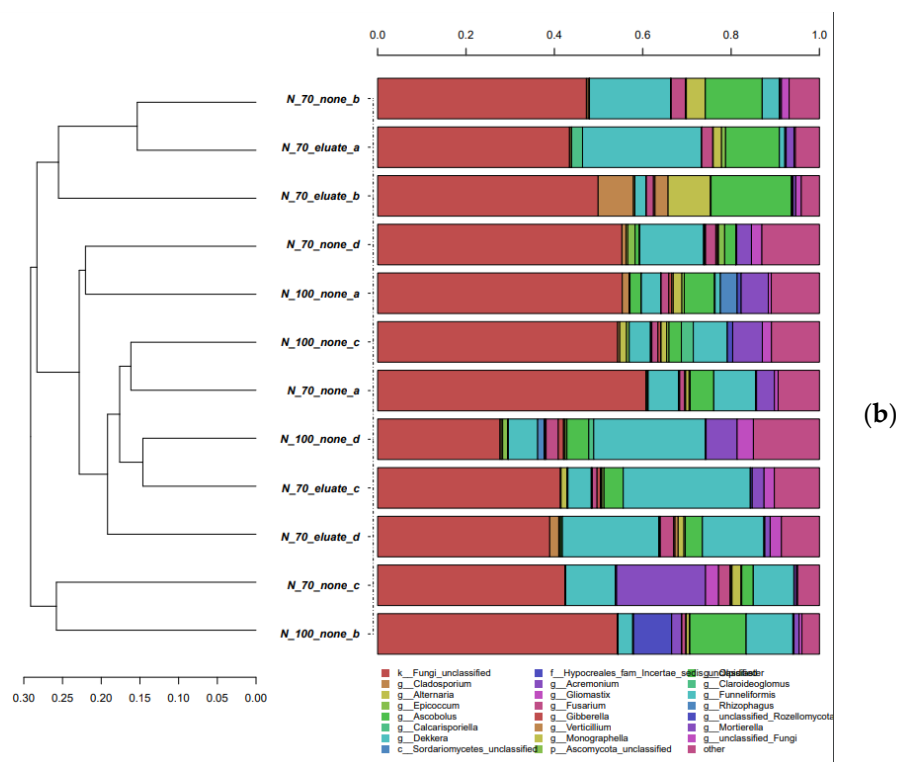

**Figure S3.** Hierarchical cluster of classified sequences using the average linkage algorithm at family classification level for bacterial taxa contributing at least 5% to a single sample for tomato (a) and lettuce (b). Taxa below the 5% threshold are attributed to the sequence group named “other”.

**Table S1:** effect of the eluate on plant growth. The bidimensional growth of lettuce plants was assessed 3 times: at T0, 7 days after planting (DAP); at T1, 29 DAP; at T2, 50 DAP. Values  $\pm$  s.d. are expressed in sqcm. Different letters differ significantly ( $P < 0.05$ , Duncan test).

| N fert.                 | T0 DAP                | T1 29 DAP                | T2 50 DAP                |
|-------------------------|-----------------------|--------------------------|--------------------------|
| N100%                   | 45.49 ( $\pm$ 4.81) a | 198.58 ( $\pm$ 18.95) ab | 333.18 ( $\pm$ 27.28) ab |
| N70%                    | 46.99 ( $\pm$ 3.14) a | 191.22 ( $\pm$ 6.61) b   | 297.48 ( $\pm$ 9.08) b   |
| N70% + N30% from eluate | 47.33 ( $\pm$ 6.99) a | 215.21 ( $\pm$ 13.48) a  | 344.14 ( $\pm$ 27.90) a  |

**Table S2:** effect of the eluate on plant growth. Average growth values ( $\pm$  s.d.) between T0-T1, T1-T2 and T0-T2 indicate that the use of the eluate to substitute 30% N is efficient in restoring and ameliorating plant growth. T0, 7 days after planting (DAP); at T1, 29 DAP; at T2, 50 DAP. Values  $\pm$  s.d. are expressed in sqcm. Different letters differ significantly ( $P < 0.05$ , Duncan test).

| N fert.                 | T0-T1                   | T1-T2                   | T0-T2                    |
|-------------------------|-------------------------|-------------------------|--------------------------|
| N100%                   | 153.09 ( $\pm$ 19.07) a | 134.60 ( $\pm$ 38.34) a | 287.69 ( $\pm$ 23.39) ab |
| N70%                    | 144.23 ( $\pm$ 9.38) a  | 106.26 ( $\pm$ 14.79) a | 250.49 ( $\pm$ 8.23) b   |
| N70% + N30% from eluate | 167.88 ( $\pm$ 20.16) a | 128.93 ( $\pm$ 21.78) a | 296.80 ( $\pm$ 31.07) a  |

**Table S3** ripe and unripe tomato fruit number and weight. Ripe fruits were harvested 2 times, and unripe tomatoes were harvested at the end of the trial. Values  $\pm$  s.d. are expressed in g. Different letters differ significantly ( $P < 0.05$ , Duncan test).

| N fert.                 | Ripe 1° harvest          | Ripe 2° harvest         | Total ripe              | unripe                   | Total number          |
|-------------------------|--------------------------|-------------------------|-------------------------|--------------------------|-----------------------|
| <b>Fruit number</b>     |                          |                         |                         |                          |                       |
| N100%                   | 10.50 ( $\pm$ 1.79) a    | 28.69 ( $\pm$ 2.66) a   | 39.19 ( $\pm$ 2.90) a   | 27.31 ( $\pm$ 6.00) b    | 66.50 ( $\pm$ 5.86) b |
| N70%                    | 12.15 ( $\pm$ 1.44) a    | 29.35 ( $\pm$ 2.20) a   | 41.50 ( $\pm$ 2.76) a   | 24.63 ( $\pm$ 4.14) b    | 66.13 ( $\pm$ 3.37) b |
| N70% + N30% from eluate | 9.31 ( $\pm$ 1.89) a     | 30.75 ( $\pm$ 3.54) a   | 40.06 ( $\pm$ 3.89) a   | 38.75 ( $\pm$ 6.41) a    | 78.81 ( $\pm$ 4.30) a |
| <b>Fruit weight (g)</b> |                          |                         |                         |                          |                       |
| N100%                   | 101.93 ( $\pm$ 16.46) ab | 249.86 ( $\pm$ 13.64) a | 351.79 ( $\pm$ 13.54) a | 118.46 ( $\pm$ 29.07) ab |                       |
| N70%                    | 121.73 ( $\pm$ 12.01) a  | 255.29 ( $\pm$ 8.77) a  | 377.01 ( $\pm$ 17.05) a | 76.71 ( $\pm$ 24.48) b   |                       |
| N70% + N30% from eluate | 87.02 ( $\pm$ 12.39) a   | 274.65 ( $\pm$ 35.48) a | 361.67 ( $\pm$ 26.06) a | 163.29 ( $\pm$ 44.74) a  |                       |
